# Supplementary material
Source: publisher figshare collection journal article supplement (https://gsajournals.figshare.com/ndownloader/files/22007667)
Supplement: Supplementary file 1 [file 22007667]

## Sheet: Sheet1
Table S3. Read statistics of long reads used for genome assemblies
Metrics	Pm1/GH34	Pm4	Pm15	Pp2/GH49	Pp3	Pp15
Total number of bases (Kbp)	29462.4	46174.8	23495.4	43037	37437.6	35842.2
Number of reads	2867546	3354633	2716479	4454033	2884835	2428092
Average length of reads	10274.4	13764.5	8649.22	9662.47	12977.4	14761.5
Minimum length of reads	50	50	50	50	50	50
Maximum length of reads	99988	113545	105072	79326	120334	128837
Median length	8706	10918	0.48	0.49	0.48	0.48
N10 length	26558	42903	28575	25213	38507	42429
N20 length	22659	34737	22982	21407	30916	34496
N30 length	20089	29306	19604	19035	26217	29493
N40 length	18096	25133	16949	17245	22809	25740
N50 length	16346	21701	14487	15591	20112	22668
N60 length	14458	18733	12059	13610	17756	19901
N70 length	12062	15768	9677	11240	15135	17070
N80 length	9277	12204	7275	8653	11700	13548
N90 length	6034	7876	4680	5665	7530	8714
N10 index	95668	89533	66779	146090	79898	70146
N20 index	216572	210063	159412	332679	189408	164617
N30 index	354981	355246	270492	546504	321414	277397
N40 index	509729	525728	399491	784347	474898	407743
N50 index	681010	723692	549338	1046599	649954	556290
N60 index	872151	952799	726843	1340974	847953	725017
N70 index	1094191	1220693	944052	1687945	1075330	918981
N80 index	1371166	1550992	1222991	2122097	1354559	1152625
N90 index	1759008	2015028	1620267	2727570	1747204	1476846
Number of reads >= 100bp	2857421	3327270	2688918	4433803	2865553	2416081
Average length of reads >= 100bp	10310.6	13877.1	8737.13	9706.21	13064.2	14834.5
N50 reads >= 100bp	16346	21701	14488	15591	20113	22669
GC percentage	0.5	0.48	6305	8089	10683	12573
